# Supplementary material for: Source and variability of formaldehyde (HCHO) at northern high latitude: an integrated satellite, ground/aircraft, and model study
Source: Copernicus journal article supplement (doi:10.5194/acp-2021-820), 2021-10-11
Supplement: Supplementary file [file acp-2021-820-AC1-supplement.pdf]

## Response to Reviewer #1

We are grateful to the reviewer for the valuable comments that facilitate the important improvements of the original manuscript. We list the point-by-point responses below. The reviewer's comments are marked black and our responses are marked dark blue. Line numbers refer to the discussion paper acp-2021-820. We attach the updated figures and supplementary information in the end.

Overall, this is an interesting and well written paper addressing VOC production and measurement in an understudied region. I think it is suitable for publication in ACP after some minor revisions. I think the primary areas that need to be addressed are:

The MAX-DOAS section. The MAX-DOAS geometric approximation for VCDs requires that the bulk of the trace gas column be above the scattering height. At line 373 you note that the HCHO column has a large fraction above the lowest kilometers, which already brings the validity of the geometric approximation into question. Moreover, you note that that you're looking at presenting optimally estimated profiles in a follow-up paper. In my view, the vertical profiling capability of the MAX-DOAS is its chief advantage as a ground-based measurement technique. It could provide you with some useful information to compare in this paper to ATOM results, and then to modelled profiles. I really don't think that geometric approximated MAX-DOAS VCDs (even if valid) are adding much to your discussion. It would be better either to leave the MAX-DOAS results out and save them for your follow-up paper, or (best case scenario!) incorporate the full optimally estimated profiles into this paper to take advantage of the MAX-DOAS's full capability.

We agree with the reviewer and will save the MAX-DOAS part from our follow-up paper.

The uncertainty section (4.4). This section could be tidied up and incorporated into your other results sections. You list many examples of uncertainty in different parameters from different papers, and yet I am still a little unclear on how you arrive eventually at the 90 % and 35 % uncertainty values for fire-free and fire-influenced scenarios. It would be great to spell out exactly how you incorporate each uncertainty term to calculate the final uncertainty. I also think you should do this earlier in the results section. This would aid your discussion of agreement between TROPOMI and GEOS-Chem by allowing you to specify whether/when/where you find agreement between the two less/greater than the TROPOMI uncertainty. You could help this further by including in your map plots (Figs 4,5 and 6) difference maps (GEOS-Chem minus TROPOMI or vice versa) to visually see where the agreement is below the uncertainty and/or less than the TROPOMI detection limit.

All the uncertainty values are directly from TROPOMI L2 HCHO ATBD. We reorganized the uncertainty part by:

1. Add a paragraph at the end of section 2.1: "We estimate the total uncertainty of reprocessed TROPOMI HCHO vertical column to be  $\geq 90\%$  for fire free region (TROPOMI L2 HCHO Algorithm Theoretical Basis Document, <https://sentinels.copernicus.eu/documents/247904/2476257/Sentinel-5P-ATBD-HCHO-TROPOMI.pdf/db71e36a-8507-46b5-a7cc-9d67e7c53f70?t=1646910030856>, and

references therein). This includes 75% of uncertainties from the  $AMF_{SAT}$ , 25% from  $dSCD_{SAT}$  and 40% from  $VCD_{0,SAT}$ . The uncertainties in regions with strong fire are estimated to be  $\geq 35\%$ , including 30% of uncertainties from  $AMF_{SAT}$ , 15% from  $dSCD_{SAT}$  and 10% from  $VCD_{0,SAT}$ . The relative lower uncertainties reflect much stronger VCDs in these wildfire regions.”

2. Remove the uncertainty section 4.4 and add a paragraph at the end of section 4.3 to address the uncertainty associated with retrievals in wildfire region: “Satellite retrievals of HCHO in wildfire region remains as a major challenge. One source of uncertainty stems from a priori profiles used in AMF calculation (Kwon et al., 2017). We find that for regions with heavy smokes, our calculated GEOS-Chem  $AMF_{GC}$  is 50% lower than the  $AMF_{SAT}$  in the operational product, due to the difference in HCHO vertical profiles (Figure S3). As a result, our reprocessed HCHO VCD product,  $VCD_{SAT,GC}$ , is higher than the operational product by  $3-5 \times 10^{15}$  molecules  $cm^{-2}$  in heavy smoke regions in July of 2019 (Figure S10). Another uncertainty lies in the aerosol optical properties. Wildfire smoke is a major source of brown carbon (June et al., 2020). As current retrieval algorithm for HCHO does not account for absorbing aerosols, it can reduce the sensitivity of satellite measurements to atmospheric layers below and above the aerosol layer, leading to a smaller AMF by 20-30%. (Jung et al., 2019; Martin et al., 2003).”

Minor corrections:

- Abstract line 1: spell out formaldehyde for the first time in the abstract too

Fixed.

- Lines 31-33: remove “to” in front of all the percentage ranges

Fixed.

- Lines 37-38: Sentence starting with “The source...” is repetition of previous information

We remove this sentence to avoid confusion.

We revise the part in abstract as “For the year with low wildfire activity (e.g., 2018), we find that HCHO VCDs are largely dominated by background HCHO (66-71%), with minor contributions from wildfires (20-32%) and biogenic VOC emissions (8-10%). For the year with intense wildfires (e.g., 2019), summertime HCHO VCD is dominated by wildfire emissions (50-72%), with minor contributions from background (22-41%) and biogenic VOCs (6-10%). In particular, the model indicates a major contribution of wildfires from direct emissions of HCHO, instead of secondary production of HCHO from oxidation of larger VOCs. We find that the column contributed by biogenic VOC is often small and below the TROPOMI detection limit, in part due to the slow HCHO production from isoprene oxidation under low  $NO_x$  conditions.”.

- Line 44: “show” not “shows”

Fixed.

- Line 51: remove “a significant amount of”, it is subjective without quantification.

We now revise the sentence as:

“Volatile organic compounds (VOCs) emitted from terrestrial vegetation play a major role in air quality and chemistry-climate interactions (Guenther et al., 1995).”

- Line 58: remove “After these biogenic... .. atmosphere”, filler and not necessary for the flow of the sentence

The sentence at line 56-59 is modified to be “Primary biogenic VOCs, including both isoprene (2-methyl-1,3-butadiene, C<sub>5</sub>H<sub>8</sub>) and monoterpenes (a class of terpenes that consist of two isoprene units, C<sub>10</sub>H<sub>16</sub>), rapidly producing HCHO through oxidation after emitted to the atmosphere (Millet et al., 2006; Palmer et al., 2006).”

- Line 61: LAI already defined

Fixed.

- Line 68: remove “been”

Fixed

- Line 77-79: Reword the sentence beginning with “This high...”. It reads like you are saying, in the end, there’s an important role of climate warming on climate, which is tautological.

The sentence is modified to be “The high temperature sensitivity suggests an important role of climate warming on BVOC emissions.”

- Line 81: HCHO already defined

The sentence is changed to be “HCHO serves as an important indicator of BVOC emissions on regional and global scales (Millet et al., 2006).”

- Line 88-89: Reword. It reads like “in regions where BVOC emissions are dominated by... the variation of BVOC emissions”, again, tautological.

The sentence is modified to be “A number of studies use satellite-based observations of the HCHO column density to quantify regional and global isoprene emissions in vegetated regions (Guenther et al., 2006; Millet et al., 2008; Palmer et al., 2003, 2006; Stavrou et al., 2009, 2014), and their interannual variability (De Smedt et al., 2010, 2015; Stavrou et al., 2018, 2015, 2014; Zhu et al., 2017; Bauwens et al., 2016)”

- Line 90: Not clear how this sentence connects to previous paragraph. For example of what?

We remove this sentence to avoid confusion.

Instead, we cite Bauwens et al.(2016) and Stavrakou et al.(2018) in the previous sentence as “A number of studies use satellite-based observations of the HCHO column density to quantify regional and global isoprene emissions in vegetated regions (Guenther et al., 2006; Millet et al., 2008; Palmer et al., 2003, 2006; Stavrakou et al., 2009, 2014), and their interannual variability (De Smedt et al., 2010, 2015; Stavrakou et al., 2018, 2015, 2014; Zhu et al., 2017; Bauwens et al., 2016)”.

- Line 128: remove “First”, unnecessary

Fixed.

- Line 131: Not sure about “accuracy”. (A) accuracy is hard to verify, as opposed to precision, and (B) I think the more important point is that ground based measurements are closer to being in-situ with, and therefore more sensitive to, the trace gas source.

The ground-based MAX-DOAS part is now removed in the revised text.

- Line 134-135: MAX-DOAS measurements are also really hard to interpret in cloudy and high AOD conditions. You say so yourself later when you omit MAX-DOAS measurements from the most smoke effected periods.

The ground-based MAX-DOAS part is now removed in the revised text.

- Line 167: “transfer” not “transport”

Fixed.

- Line 213: remove “that”

Fixed.

- Line 222: In the methods section, I would state that the reprocessed VCD has differences to TROPOMI VCD, rather than “advantages”. Stating “advantages” starts to confuse results with methodologies.

Fixed.

- Line 226: Again, save this information about how your method leads to an improvement, for the results.

We removed and reorganized the paragraph (line 222-228) to the conclusion section 5: “We further compared GEOS-Chem results with TROPOMI HCHO L2 product, reprocessed with background HCHO VCD and AMF using GEOS-Chem model output. The reprocessed product may benefit from the finer horizontal and vertical resolution of GEOS-Chem than TM5-MP model, as well as the year-specific wildfire emissions.....”

- Line 238: why different averaging times?

HCHO sampling is applied a 1-minute average. Isoprene and monoterpenes are sampled in 3-5 minutes interval and interpolated to 1-minute average.

We reorganized the ATom data introduction section 2.2. The averaging time part is now: “We make use of 1-minute averaged measurements of HCHO, isoprene, monoterpenes ( $\alpha$ -pinene and  $\beta$ -pinene) and the sum of methyl vinyl ketone and methacrolein (MVK+MACR). HCHO measurements sampled in 1-Hz frequency were made by laser induced fluorescence by the NASA In Situ Airborne Formaldehyde (ISAF) instrument (Cazorla et al., 2015). Isoprene and monoterpenes were measured by two instruments: one by the University of Irvine Whole Air Sampler WAS) followed by laboratory Gas Chromatography (GC) analysis, sampled every 3-5 minutes (Simpson et al., 2020); another by the National Center for Atmospheric Research (NCAR) Trace Organic Gas Analyzer (TOGA), sampled every 2 minutes with a 35-seconds integrated sampling time (Apel et al., 2021). MVK and MACR were measured by TOGA. These measurements are interpolated to 1-minute time resolution for model comparison. ”

- Line 252-253: Why average to 2 hours for a 3-hour window? Why not just average all results from 12:00 to 15:00 (if you end up keeping the MAX-DOAS results in)?

The ground-based MAX-DOAS part is removed.

- Line 257: state why you would want to choose the highest elevation.

The ground-based MAX-DOAS part is removed.

- Line 264: I think shift this first sentence to be the second, the second sentence of the paragraph introduces the section better.

We replace the position of the first and the second sentence. Also, we upgrade our model to be GEOS-Chem v12.7.2 to avoid a bug in v12.5.0 which makes the simulation fail to read boundary conditions.

Now the first two sentences are “GEOS-Chem is a 3-D global chemical transport model driven by Modern-Era Retrospective analysis for Research and Applications, Version 2 (MERRA-2) by the Global Modeling and Assimilation Office (GMAO) at NASA’s Goddard Space Flight Center (Rienecker et al., 2011), at a horizontal resolution of  $0.5^\circ \times 0.625^\circ$  and 72 vertical layers from surface to 0.01 hPa. Here we use GEOS-Chem v12.7.2 ([http://wiki.seas.harvard.edu/geos-chem/index.php/GEOS-Chem\\_12#12.7.2](http://wiki.seas.harvard.edu/geos-chem/index.php/GEOS-Chem_12#12.7.2)), with an update on cloud chemistry (<https://github.com/geoschem/geos-chem/issues/906>). ”

- Line 279: “have” not “has”

Fixed.

- Line 282: “BVOC emissions are calculated using”, not “follows” – follows sounds jargonistic

Fixed.

- Line 302: “has” not “have”

Fixed.

- Line 302: Might be worth noting here whether, despite extensive validation, any extensive validation exists in this kind of environment.

This sentence has been modified to “This version of isoprene chemistry in GEOS-Chem has been extensively evaluated by recent field campaigns and satellite observations over southeast US (Fisher et al., 2016; Travis et al., 2016), including HCHO production from isoprene oxidation (Zhu et al., 2016, 2020; Kaiser et al. 2018). To our knowledge, this chemistry has not been evaluated at northern high latitude.”

- Line 308-309: save for results

We remove the sentence at line 308-309 and add a sentence in the section 4.2: “. The widespread biogenic HCHO enhancement can be in part explained by the slow photooxidation in Alaska and low HCHO yield under low NO<sub>x</sub> conditions (~25-35 pptv near surface in GEOS-Chem) (Marais et al., 2012).”

- Line 324: Guide the reader with approximate altitude ranges in the text

We change the sentence to be “We show that the measured HCHO mixing ratio decreases exponentially from <2 km near surface (405 pptv) to the ~10 km upper troposphere (100 pptv).”

- Line 339: “reproduces”, not “well reproduce”

Fixed.

- Line 342: “mixing ratios are” not “mixing ratio is”
- Line 343-344: Not clear, do you mean in the lowest 2 km?

Fixed.

- Line 346: First sentence is unnecessary and emotive, rendering the second sentence repetitive.

We think that the first sentence delivers the key information of this paragraph, so it might help reader understand the paragraph easier.

- Line 352: This suggests a minor contribution in most of Alaska, but perhaps not everywhere?

We change the sentence to be “Such spatial discrepancies between HCHO and isoprene/monoterpenes suggest a minor contribution of biogenic VOC emissions to HCHO column density over Alaska during summertime.”

- Line 414: Give an example to show how “high” is “high”, perhaps by comparing to other parts of the world, to some threshold, by relationship to uncertainty or the detection limit.

We now remove this sentence to avoid confusion.

We change the sentence to be “Over Alaska domain, HCHO  $VCD_{SAT,GC}$  peaks around the interior Alaska boreal forest region (Figure S1), with  $VCD_{SAT,GC}$  as  $3.7 \times 10^{15}$  molecules  $cm^{-2}$  in July; near north slope and Gulf of Alaska,  $VCD_{SAT,GC}$  is around  $2 \times 10^{15}$  molecules  $cm^{-2}$  in July.”

- Line 419: “of” not “for”

Fixed.

- Line 420: reword to “May to August 2018”

Fixed.

- Line 423: remove “largely”, it is unnecessary

Fixed.

- Line 424-425: You say “stems from”, but all you’ve proven is that the HCHO predominantly “resides in” the lowest atmospheric layers. In fact, you highlight the large contributions of background methane oxidation which may not necessarily stem from the lowest layer at all – methane could be transported from long-range including higher atmospheric layers.

We change the sentence to be “As the majority of HCHO VCD **resides in** lowest atmospheric layers (Figure 1),.....”

- Line 425: can you comment on the extent to which fewer plants (presumably lower BVOCs) and more long-lasting snow (higher albedo, more retrieval problems) could contribute to the lower HCHO VCD in elevated regions?

The lower HCHO VCD in elevated region is mainly due to the lower HCHO background column, which is a model result. The  $dVCD$  over elevated region is in the similar magnitude as over the northern Pacific.

We add a sentence in section 4.1: “The spatial pattern of  $VCD_{0,GC}$ , most noticeable in July, is driven by the geography in Alaska, instead of surface vegetation or snow.”

- Line 429: What causes this enhanced methane oxidation?

We revise the sentence (line 428-431) in section 4.1 to be “Enhanced methane oxidation likely results from the increase of water vapor and therefore OH production, leading to a higher HCHO production via  $CH_3O_2 + NO$  reactions near surface and  $CH_3O_2 + CH_3O_2$  at higher altitudes.”

- Line 443: remind the reader what a negative  $dVCD$  physically represents.

We add a sentence behind the sentence in line 443: “Negative values reflect the fact that averaged HCHO  $dVCD_{SAT}$  is close to zero as a result of reference sector correction (TROPOMI L2 HCHO ATBD).”

- Line 450: I’m unclear on the relationship of ideas in this paragraph. How does “widespread HCHO enhancement” follow from the first sentence, then on to saying that HCHO production is actually suppressed by low  $NO_x$  levels? In addition, please clarify quantitatively what you mean by low and high  $NO_x$

We clarify the relationship between widespread HCHO enhancement and low  $NO_x$  level in section 4.2 : “The widespread biogenic HCHO enhancement can be in part explained by the slow photooxidation in Alaska and low HCHO yield under low  $NO_x$  conditions (~25-35 pptv near surface in GEOS-Chem) (Marais et al., 2012). Indeed, the HCHO production from isoprene and monoterpene emissions is lower under low  $NO_x$  conditions than high  $NO_x$  conditions (~ 1 ppbv) by a factor of 10 after 24 hours of oxidation, and it only reaches 20% of its 5-day cumulative yield, leading to a suppressed but prolonged HCHO production (Marais et al., 2012).”

- Line 472: This small section is mostly repetition of ideas in the previous paragraph, it can be incorporated or removed

We merged it to the previous paragraph in section 4.2: “..... As a result,  $dVCD_{GC,Fire}$  contributes to 20-32% of  $dVCD_{GC}$ , while  $dVCD_{GC,Bio}$  contributes to 8–10% of  $dVCD_{GC}$ . Wildfire and biogenic emission are both important for  $dVCD_{GC}$  and most active in central boreal forest region, posing a challenge to attribute TROPOMI  $dVCD_{SAT,GC}$  to individual sources.”

- Line 489: First short sentence not needed. Also, reword the next sentence to have “in the 2019 Alaskan summer.”

The second sentence already contains “2019 Alaska summer”. We remove the first sentence and change the second sentence to be “Figure 4(a) shows monthly  $VCD_{SAT,GC}$  in the 2019 Alaskan summer.”



- Line 492: add “the” between than and TROPOMI

Fixed.

- Line 497: “sources” not “source”. Also, be quantitative instead of simply saying “Much lower...”
1. Fixed
  2. We change the sentence (line 497-498) to be: “In contrast, HCHO VCD outside of the central Alaska are close to the background level, with little enhancement on background HCHO”
- Line 505: Be quantitative instead of simply saying “We find little change”

We change the sentence to be: “We find little change on  $VCD_{0,GC}$  and  $dVCD_{GC,Bio}$  ( $\sim 2 \times 10^{14}$  molecules  $cm^{-2}$ ) from 2018 to 2019 summer in model sensitivity tests,.....”

- Line 511-512: Why are the biogenic emissions higher by a factor of “1-2”? You have the numbers there, surely it is larger by a factor of 498/374 exactly?

We recalculate the values based on the new simulation.

We change the sentence to be: “Consequently,  $dVCD_{GC,Fire}$  is higher than  $dVCD_{GC,Bio}$  by a factor of 10 in 2019 Alaska summer, despite that NMVOC from wildfires (498 GgC) are only higher than biogenic emissions (389 GgC) by 30%.”

- Line 534: Don’t have “etc”, be specific.

Fixed.

- Conclusions: I think you want to start your conclusions with positive results, what you want people to take away from this paper, not another summary of the previous literature. Imagine you get to the end of the paper, and after all that reading the first thing you see in the conclusion is “VOC emissions... remain poorly quantified...”. No – tell the reader why the work you’ve done is great! Tell them how you’ve helped close a literature gap, don’t highlight how one is still open. To achieve that, you can significantly shorten your conclusion, cutting it to the most salient points only.

We now revised the conclusion as:

“The Arctic/boreal terrestrial ecosystem is undergoing rapid changes in recent decades, but VOC emissions from Arctic and boreal vegetation and wildfires remains poorly quantified, limiting our capability for understanding biosphere-atmosphere exchange in this region and its feedback on Arctic climate and air quality. In this work, we use satellite-based observations of HCHO VCD from the TROPOMI instrument on-board S5P satellite, combined with a nested grid

chemical transport model, to examine the source and variability of HCHO VCD in Alaska for the summers with low fire activities (2018) and high fire activities (2019).

We first evaluate the GEOS-Chem nested simulation ( $0.5^\circ \times 0.625^\circ$ ) with *in-situ* airborne measurements in Alaska from the ATom-1 mission. We show reasonable agreement between observed and modeled HCHO, isoprene, monoterpenes and the sum of MVK+MACR in the continental boundary layer. In particular, HCHO profiles show spatial homogeneity in Alaska, suggesting a minor contribution of biogenic emissions to HCHO VCD.

We further compared GEOS-Chem results with TROPOMI HCHO L2 product, reprocessed with background HCHO VCD and AMF using GEOS-Chem model output. The reprocessed product may benefit from the finer horizontal and vertical resolution of GEOS-Chem than TM5-MP model, as well as the year-specific wildfire emissions. We find that reprocessed TROPOMI HCHO VCD<sub>SAT,GC</sub> is dominated by background HCHO VCD<sub>0,GC</sub> from methane oxidation in a mild wildfire summer. Wildfires have a larger contribution to HCHO total column than biogenic emissions, even in a year with mild wildfires. This result is in part due to the direct emission of HCHO from wildfires, and in part due to the slow and small production of HCHO from isoprene and monoterpenes oxidation under low NO<sub>x</sub> conditions.

For the year with large wildfires in Alaska (2019), we find that TROPOMI and model show good agreement on magnitude and spatial pattern of HCHO VCD, and wildfire becomes the largest contributor to HCHO VCD. Model sensitivity suggests the direct emission of HCHO from wildfires accounts for the majority of HCHO VCD. While the emission factor of HCHO from wildfires (1.86 g/kg dry matter for boreal forest) applied in our model largely agree with field measurements, the role of secondary production of HCHO is likely underestimated due to unaccounted VOCs and underrepresented plume chemistry. We show that wildfire signals can be detected by TROPOMI HCHO product, making TROPOMI a semi-quantitative tool to constrain wildfire emissions in Alaska given the large uncertainties associated with HCHO retrieval in wildfire plumes. As the Arctic and boreal region continue to warm, we expect HCHO VCD in Alaska continues to be driven by wildfires and background methane oxidation.

Quantifying HCHO at northern high latitude can be further improved in several aspects. First, we show that background signal, often taken from model output, can be dominant in final product of HCHO VCD. However, model results differ significantly on HCHO even over Pacific Ocean (Figure S8), leading to a large uncertainty in the final satellite product in this region. Second, reference sector correction represents another major uncertainty (Zhu et al., 2020). This is particularly a problem for Alaska, as it lies in the reference sector defined by most retrieval algorithms (González Abad et al., 2015; De Smedt et al., 2018). Any systematic bias in Alaska can propagate to retrievals in other regions. Third, pristine regions can also be influenced by wildfire plumes, which can largely impact HCHO retrieval. Future work is warranted to improve HCHO retrieval and therefore our understanding of HCHO at northern high latitude.”
